# Supplementary material for: A novel 2D VC4 as a promising Na-host material for Na-ion batteries: computational insights
Source: Royal Society of Chemistry journal article supplement (doi:10.1039/d3ta06579k), 2024-01-01
Supplement: d3ta06579k1.pdf [file d3ta06579k1.pdf]

## Supporting Information

### A novel 2D VC<sub>4</sub> as a promising Na-host material for Na-ion batteries: computational insights

Javed Rehman<sup>3#</sup>, Jiayu Gao<sup>1#</sup>, Tong Yu<sup>2\*</sup>, Adel El-marghany<sup>4</sup>, Guochun Yang<sup>1\*</sup>

1. State Key Laboratory of Metastable Materials Science & Technology and Key Laboratory for Microstructural Material Physics of Hebei Province, School of Science, Yanshan University, Qinhuangdao 066004, China
2. Shenyang National Laboratory for Materials Science, Institute of Metal Research, Chinese Academy of Sciences, Shenyang 110016, China
3. State Key Laboratory of Metastable Materials Science and Technology, and School of Materials Science and Engineering, Yanshan University, Qinhuangdao 066004, China
4. Department of Chemistry, College of Science, King Saud University, P.O. Box 2455, Riyadh 11451, Saudi Arabia

Correspondence should be addressed to:

\* tyu@imr.ac.cn (T. Yu) and yanggc468@nenu.edu.cn (G. Yang)

#Javed Rehman and Jiayu Gao contributed equally to this work.

## Computational Details

The particle swarm optimization (PSO) method within the evolutionary algorithm as implemented in the Crystal structure Analysis by Particle Swarm Optimization (CALYPSO) code<sup>1</sup> was employed to find the lowest energy structures of VC<sub>4</sub> monolayers. Unit cells containing 1, 2, and 4 formula units (f.u.) were considered. In the first step, random structures with certain symmetries are built, in which atomic coordinates are generated by the crystallographic symmetry operations. Local optimizations using the VASP code were done with the conjugate gradients method and stopped when Gibbs free energy changes became smaller than  $1 \times 10^{-5}$  eV per cell. After processing the first-generation structures, 60% of them with lower Gibbs free energies are selected to construct the next generation structures by PSO. 40% of the structures in the new generation are randomly generated. A structure fingerprinting technique of bond characterization matrix is applied to the generated structures, so that identical structures are strictly forbidden. These procedures significantly enhance the diversity of the structures, which is crucial for structural global search efficiency. In most cases, structural searching simulations for each calculation were stopped after generating 1000 ~ 1200 structures (e.g., about 20 ~ 30 generations).

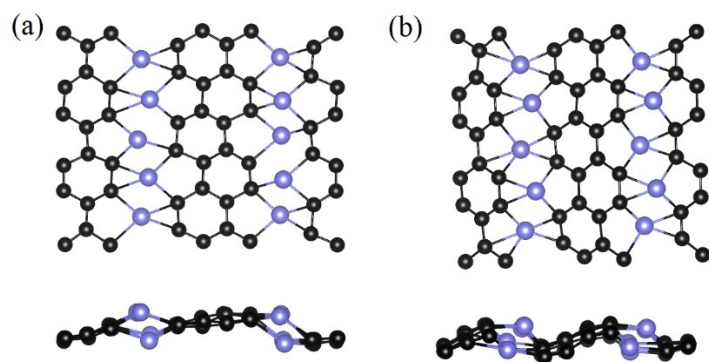

Fig. S1 Structures of VC<sub>4</sub> after 10 ps steps of AIMD at (a) 500 K and (b) 1000 K.

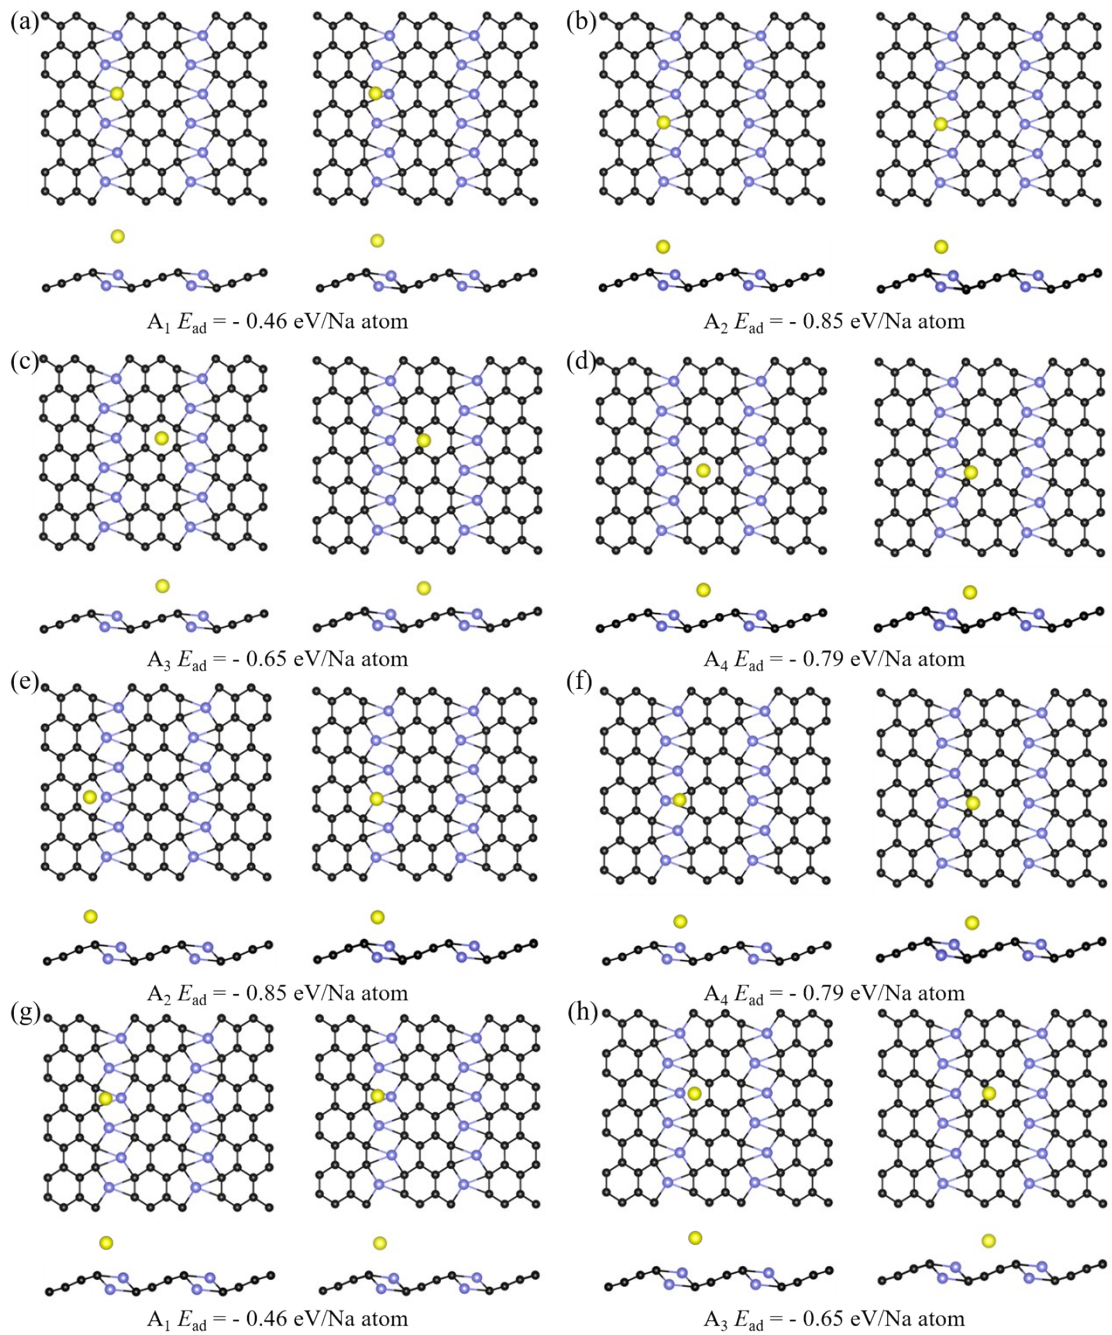

Fig. S2 Adsorption of Na on monolayer VC<sub>4</sub> at (a) A<sub>1</sub>-site, (b) A<sub>2</sub>-site, (c) A<sub>3</sub>-site, (d) A<sub>4</sub>-site, (e) A<sub>2</sub>-site, (f) A<sub>4</sub>-site, (g) A<sub>1</sub>-site, and (h) A<sub>3</sub>-site.

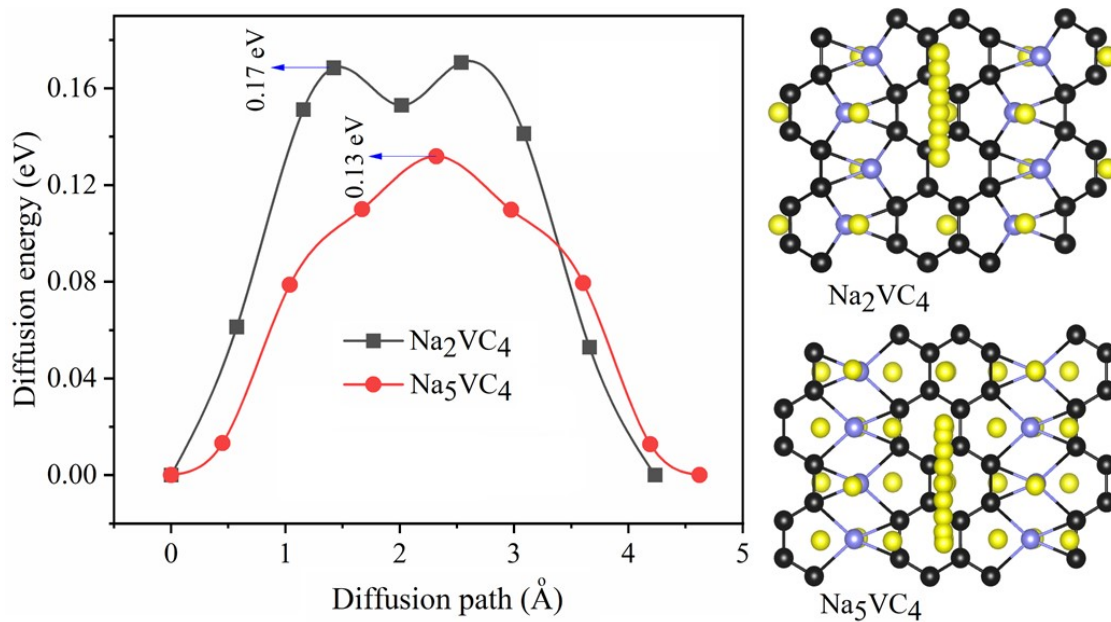

Fig. S3 Diffusion energy barrier and their corresponding path of Na<sub>x</sub>VC<sub>4</sub> at x = 2 and 5.

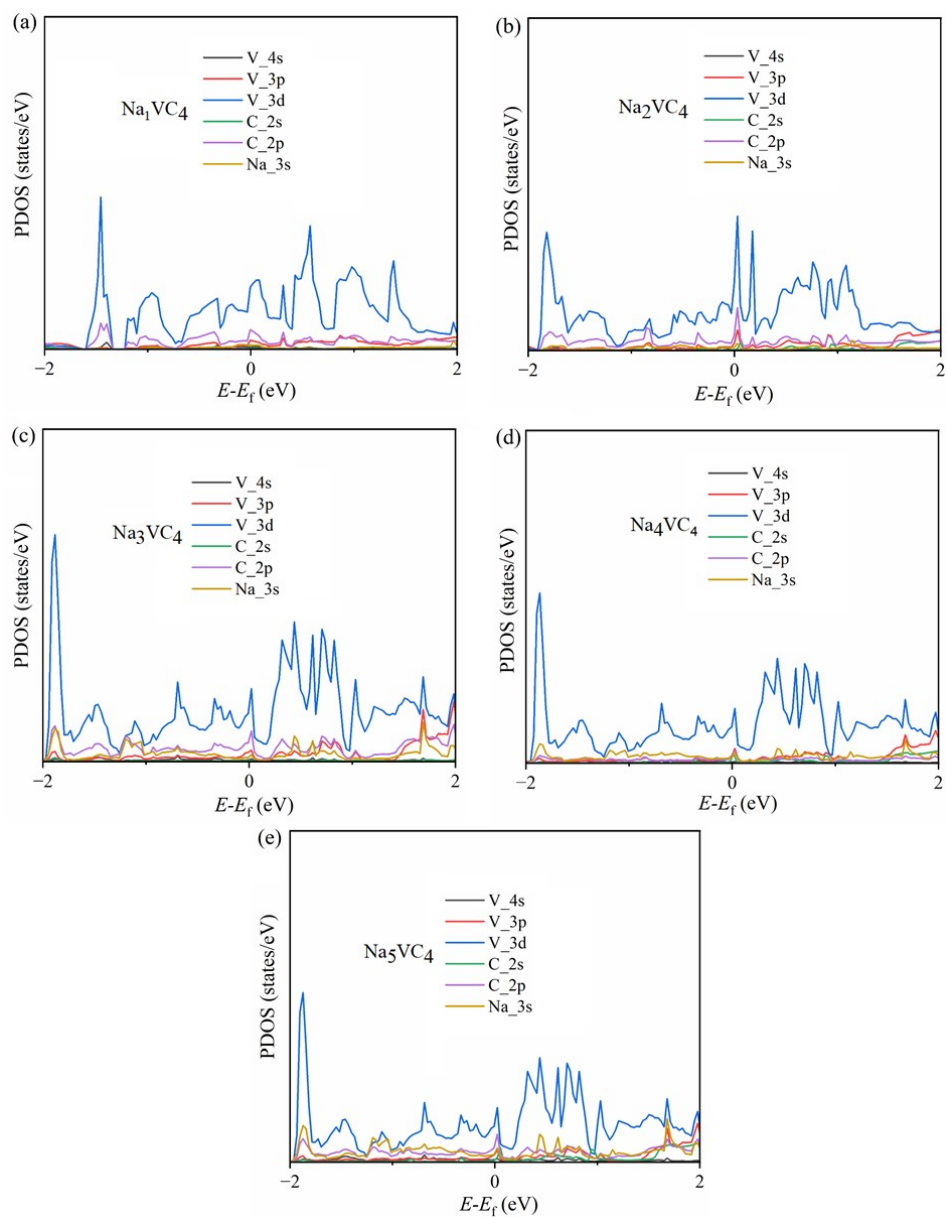

Fig. S4 Partial density of states of (a)  $\text{Na}_1\text{VC}_4$ , (b)  $\text{Na}_2\text{VC}_4$ , (c)  $\text{Na}_3\text{VC}_4$ , (d)  $\text{Na}_4\text{VC}_4$ , and (e)  $\text{Na}_5\text{VC}_4$ .

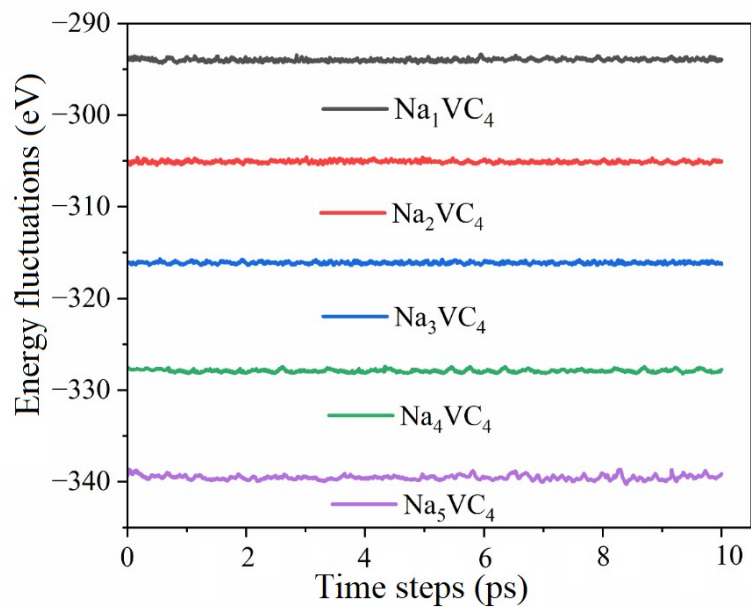

Fig. S5 Energy fluctuations versus time steps of Na<sub>x</sub>VC<sub>4</sub> ( $x = 1, 2, 3, 4, \text{ and } 5$ ) at 300 K after 10 ps.

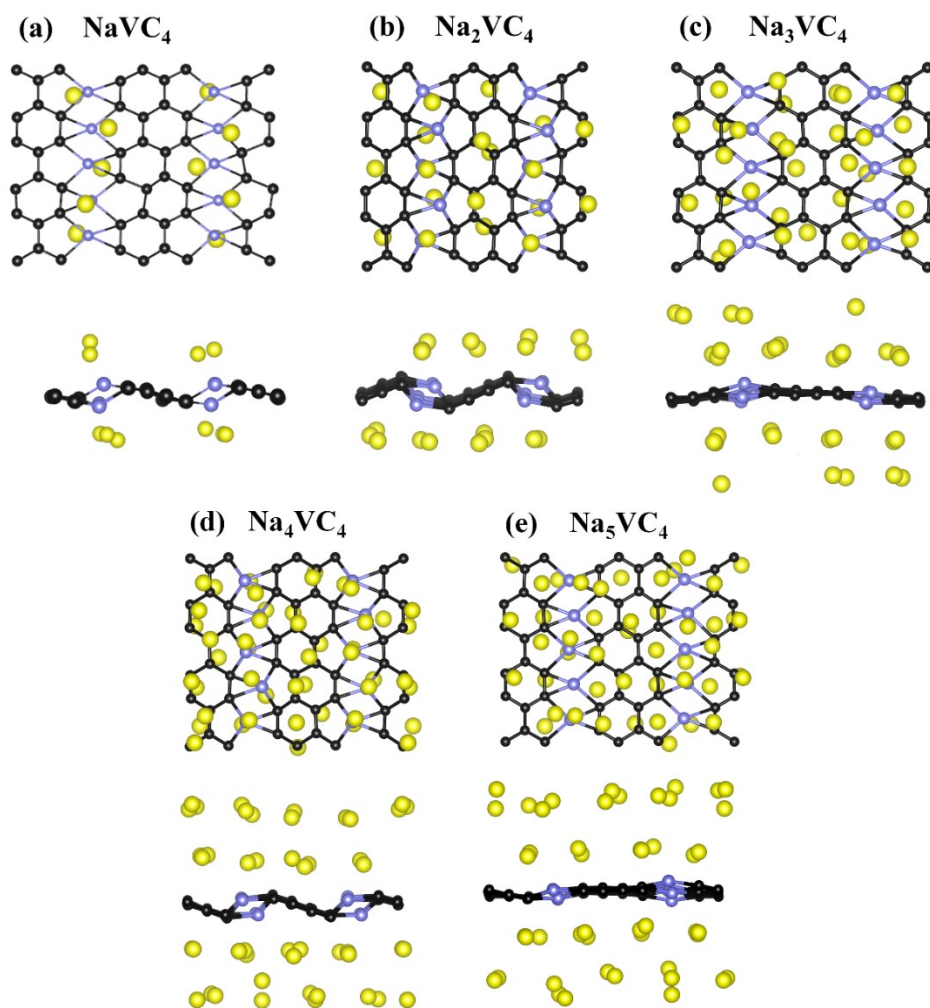

Fig. S6 Structural snapshots of  $\text{Na}_x\text{VC}_4$  ( $x = 1, 2, 3, 4,$  and  $5$ ) at 300 K after 10 ps.



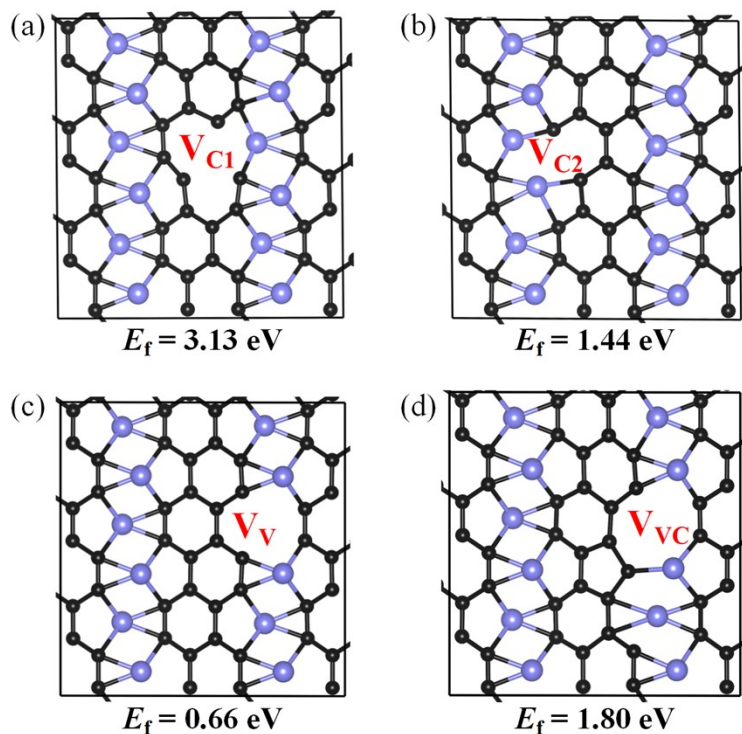

Fig. S7 Optimized geometry of various defects in VC<sub>4</sub> monolayer. (a) VC<sub>1</sub>, (b) VC<sub>2</sub>, (c) V<sub>v</sub>, (d) V<sub>vc</sub> vacancy.

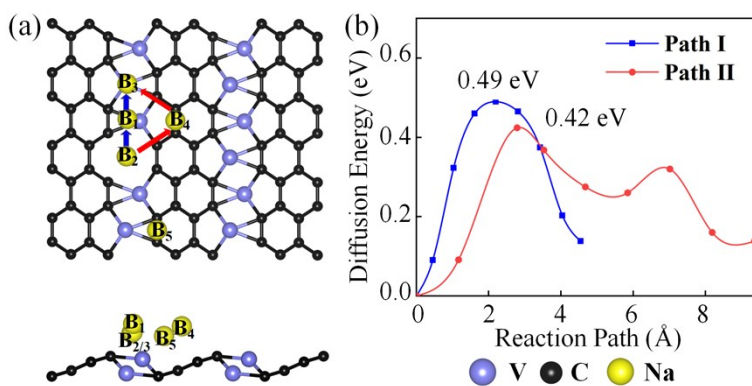

Fig. S8 (a) The inequivalent adsorption sites of 2D VC<sub>4</sub> with V<sub>v</sub> vacancy, named as B<sub>1</sub>, B<sub>2</sub>, B<sub>3</sub>, B<sub>4</sub>, and B<sub>5</sub>. The side view of B<sub>2</sub> and B<sub>3</sub> are denoted as B<sub>2/3</sub> due to their close positions in the z direction. The considered migration paths of Na diffusion on the 2D VC<sub>4</sub> with V<sub>v</sub> vacancy. (b) The corresponding diffusion energy barrier profiles of path I and path II.

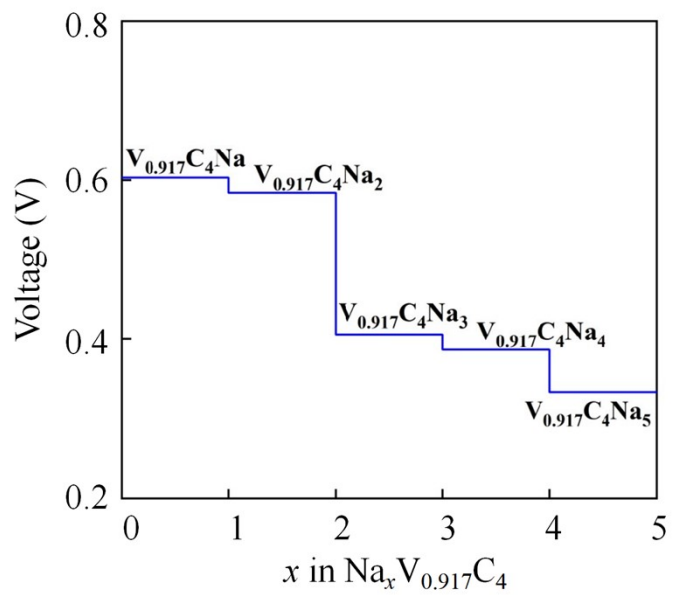

Fig. S9 Average voltages of different Na concentrations in Na<sub>x</sub>V<sub>0.917</sub>C<sub>4</sub> (x = 1-5).

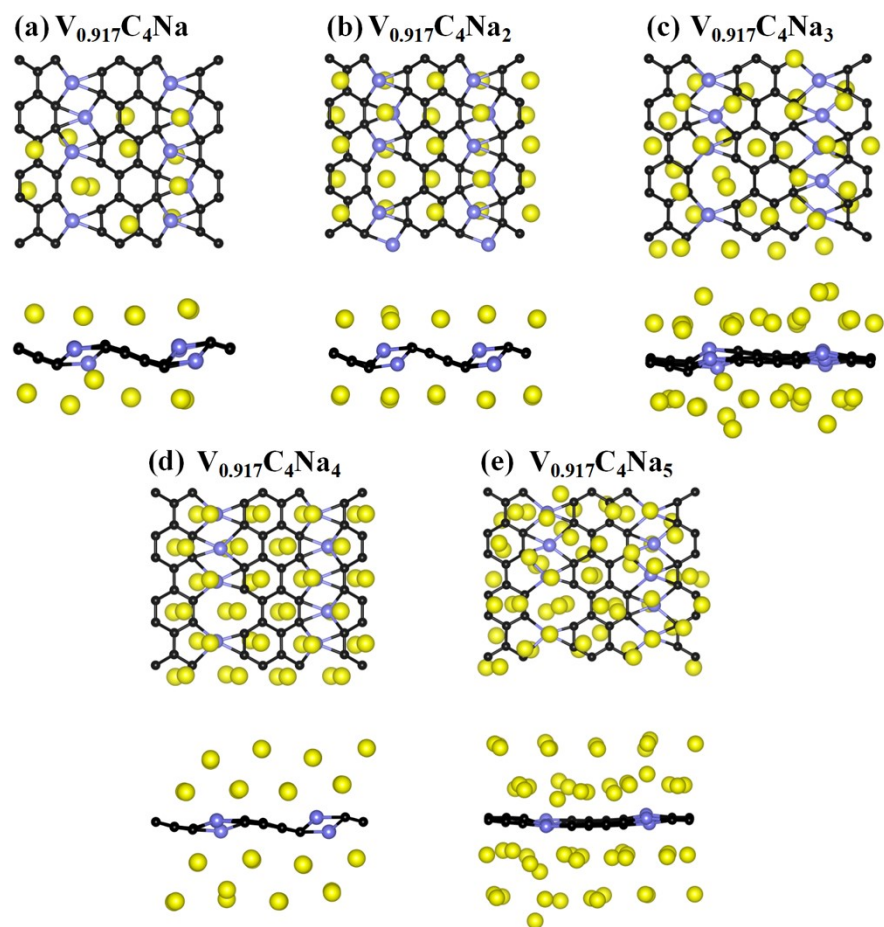

Fig. S10 Optimized structures of  $Na_xV_{0.917}C_4$  ( $x = 1-5$ ).

Table S1 Comparative study of the calculated voltage, energy barrier, and Na storage capacity of VC<sub>4</sub> monolayer with previously reported 2D materials.

| Material                            | Voltage (V) | Diffusion barrier (eV) | Capacity (mAh g <sup>-1</sup> ) | Ref.      |
|-------------------------------------|-------------|------------------------|---------------------------------|-----------|
| <b>Li-CuC<sub>6</sub></b>           | 0.34        | 0.41                   | 1188                            | 2         |
| <b>Li-Mo<sub>2</sub>C</b>           | 0.14        | 0.13                   | 526                             | 3         |
| <b>Li-VC<sub>2</sub></b>            | 0.40        | 0.09                   | 1430                            | 4         |
| <b>K-SnC</b>                        | 0.41        | 0.17                   | 410                             | 5         |
| <b>K-PC<sub>6</sub></b>             | 0.64        | 0.29                   | 780                             | 6         |
| <b>Na-CP<sub>3</sub></b>            | 0.53        | 0.35                   | 2298                            | 7         |
| <b>Na-ZrC<sub>2</sub></b>           | 0.25        | 0.02                   | 932                             | 8         |
| <b>Na-TiC<sub>3</sub></b>           | 0.18        | 0.20                   | 1278                            | 9         |
| <b>Li-NiC<sub>3</sub></b>           | 0.17        | 0.50                   | 1698                            | 10        |
| <b>Na-V<sub>2</sub>C</b>            | 0.49        | 0.14                   | 300                             | 11        |
| <b>Na-Twin-Graphene</b>             | 1.09        | 0.198                  | 496                             | 12        |
| <b>Na<sub>x</sub>VC<sub>4</sub></b> | 0.51        | 0.32                   | 1353                            | This work |

Table S2 Adsorption energies of Na at different sites on  $V_{0.917}C_4$  monolayer.

| Site                      | Adsorption energies<br>(eV/Na atom) |
|---------------------------|-------------------------------------|
| <b>B<sub>1</sub>-site</b> | - 0.73                              |
| <b>B<sub>2</sub>-site</b> | - 0.82                              |
| <b>B<sub>3</sub>-site</b> | - 0.65                              |
| <b>B<sub>4</sub>-site</b> | - 0.48                              |
| <b>B<sub>5</sub>-site</b> | - 0.61                              |

## References

1. Wang, Y.; Lv, J.; Zhu, L.; Ma, Y., CALYPSO: A method for crystal structure prediction. *Computer Physics Communications* **2012**, *183* (10), 2063-2070.
2. Lu, S.; Yang, C.; Fan, D.; Hu, X., Perfect planar tetra-coordinated MC 6 monolayer: superior anode material for Li-ion battery. *Physical Chemistry Chemical Physics* **2019**, *21* (27), 15187-15194.
3. Sun, Q.; Dai, Y.; Ma, Y.; Jing, T.; Wei, W.; Huang, B., Ab initio prediction and characterization of Mo<sub>2</sub>C monolayer as anodes for lithium-ion and sodium-ion batteries. *The journal of physical chemistry letters* **2016**, *7* (6), 937-943.
4. Xu, J.; Wang, D.; Lian, R.; Gao, X.; Liu, Y.; Yury, G.; Chen, G.; Wei, Y., Structural prediction and multilayer Li+ storage in two-dimensional VC 2 carbide studied by first-principles calculations. *Journal of Materials Chemistry A* **2019**, *7* (15), 8873-8881.
5. Rehman, J.; Fan, X.; Laref, A.; Zheng, W., Adsorption and diffusion of potassium on 2D SnC sheets for potential high-performance anodic applications of potassium-ion batteries. *ChemElectroChem* **2020**, *7* (18), 3832-3838.
6. Yang, M.; Kong, F.; Chen, L.; Tian, B.; Guo, J., Potential application of two-dimensional PC6 monolayer as an anode material in alkali metal-ion (Li, Na, K) batteries. *Thin Solid Films* **2023**, *769*, 139734.
7. Cheng, Z.; Zhang, X.; Zhang, H.; Gao, J.; Liu, H.; Yu, X.; Dai, X.; Liu, G.; Chen, G., Prediction of two-dimensional CP 3 as a promising electrode material with a record-high capacity for Na ions. *Nanoscale Advances* **2020**, *2* (11), 5271-5279.
8. Zhang, F.; Jing, T.; Cai, S.; Deng, M.; Liang, D.; Qi, X., Two-dimensional ZrC 2 as a novel anode material with high capacity for sodium ion battery. *Physical Chemistry Chemical Physics* **2021**, *23* (22), 12731-12738.
9. Yu, T.; Zhao, Z.; Liu, L.; Zhang, S.; Xu, H.; Yang, G., TiC<sub>3</sub> monolayer with high specific capacity for sodium-ion batteries. *Journal of the American Chemical Society* **2018**, *140* (18), 5962-5968.
10. Zhu, C.; Qu, X.; Zhang, M.; Wang, J.; Li, Q.; Geng, Y.; Ma, Y.; Su, Z., Planar NiC 3 as a reversible anode material with high storage capacity for lithium-ion and sodium-ion batteries. *Journal of Materials Chemistry A* **2019**, *7* (21), 13356-13363.

11. Li, Y.-M.; Guo, Y.-L.; Jiao, Z.-Y., The effect of S-functionalized and vacancies on V<sub>2</sub>C MXenes as anode materials for Na-ion and Li-ion batteries. *Current Applied Physics* **2020**, *20* (2), 310-319.
12. Dua, H.; Deb, J.; Paul, D.; Sarkar, U., Twin-graphene as a promising anode material for Na-ion rechargeable batteries. *ACS Applied Nano Materials* **2021**, *4* (5), 4912-4918.
